# Supplementary material
Source: PubMed Central journal article supplement (PMC3376492)
Supplement: mmc1.pdf [file mmc1.pdf]

**The American Journal of Human Genetics, Volume 90**

## **Supplemental Data**

**A Genome-wide Association Study Reveals that Variants  
within the HLA Region Are Associated with Risk  
for Nonobstructive Azoospermia**

Han Zhao, Jianfeng Xu, Haobo Zhang, Yingpu Sun, Jielin Sun, Zhong Wang, Jiayin Liu, Qiang Ding, Shaoming Lu, Rong Shi, Li You, Yingying Qin, Xiaoming Zhao, Xiaoling Lin, Xiao Li, Junjie Feng, Li Wang, Jeffrey M. Trent, Chengyan Xu, Ying Gao, Bo Zhang, Xuan Gao, Jingmei Hu, Hong Chen, Guangyu Li, Junzhao Zhao, Shuhua Zou, Hong Jiang, Cuifang Hao, Yueran Zhao, Jinglong Ma, S. Lilly Zheng, and Zi-Jiang Chen

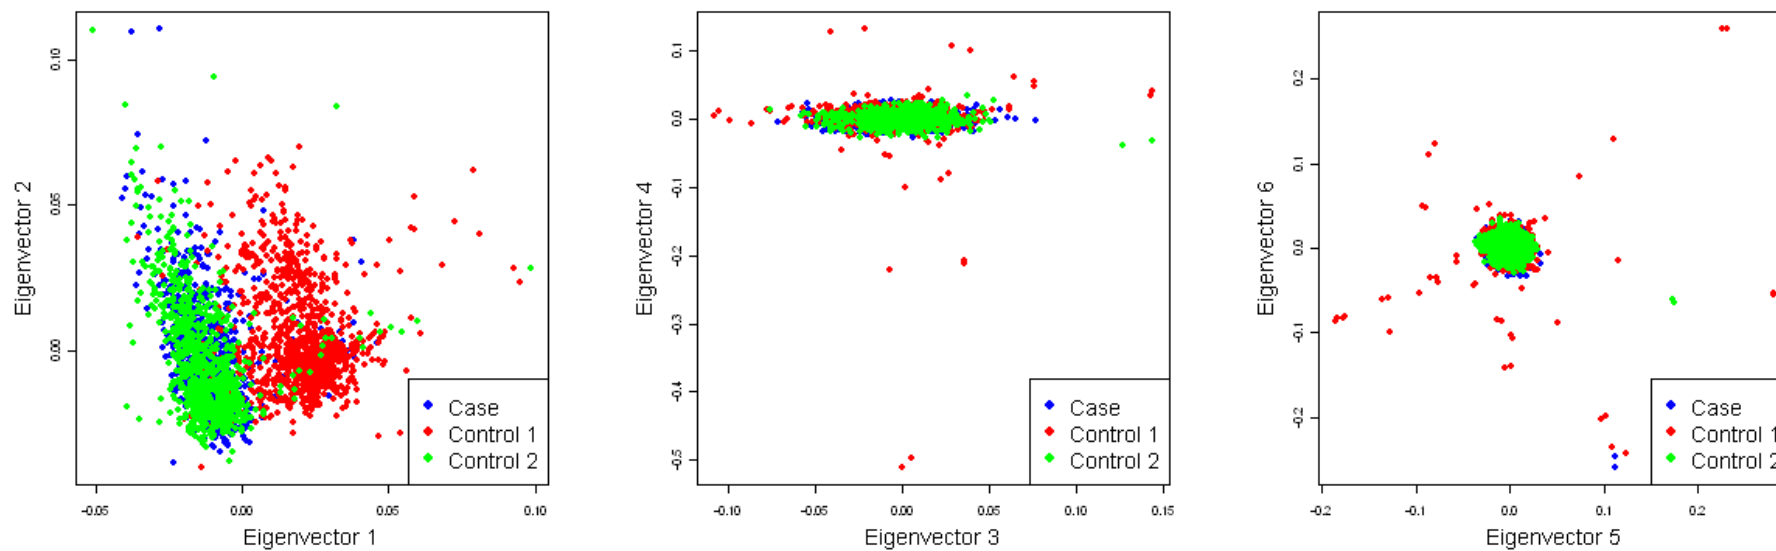

**Figure S1. Principal Component Analysis of GWAS Samples of Nonobstrusive Assospermia (NOA) for the First Six Dimensions**

From left to right, X-axis and Y-axis present the first vs the second, the third vs the fourth, and the fifth vs the sixth eigen vector identified by principal component analysis using Eigenstrat software, respectively. Control 1 refers to the 1,000 male controls and Control 2 refers to the 863 female controls.

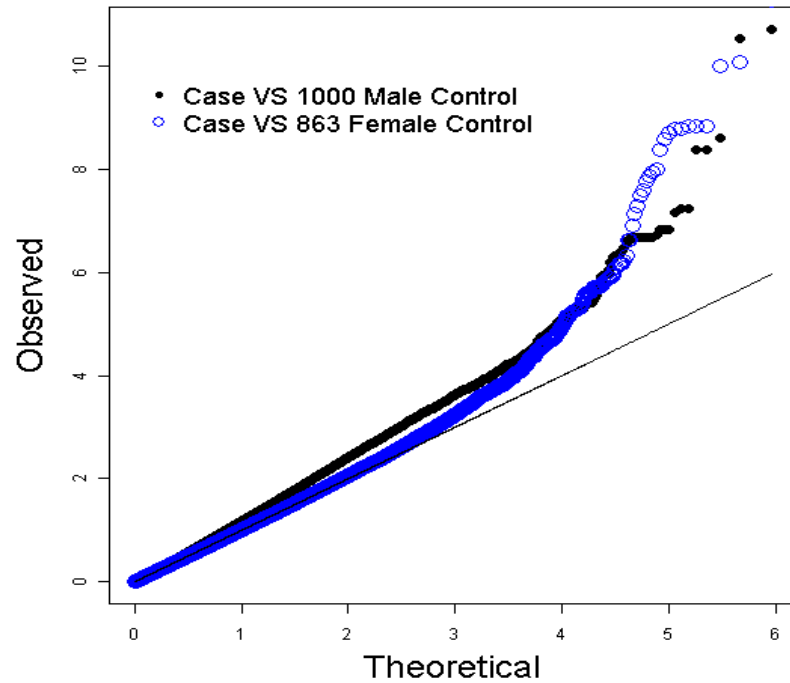

**Figure S2. Quantile-Quantile Plots**

The quantile-quantile (Q-Q) plot of observed versus expected test statistics was adjusted for age and first eigen ( $\chi^2$  test). The line in black indicated the association results for NOA cases vs 1,000 male controls. The line in blue indicated the association results for NOA cases vs 863 female controls.

**Table S1. SNPs That Are Associated with NOA Risk in the Chinese Population**

| CHR | SNP        | BP          | Alleles |    | GWAS            |                   |      |          |      | Confirmation (Northern China) |                 |                   |      |          |
|-----|------------|-------------|---------|----|-----------------|-------------------|------|----------|------|-------------------------------|-----------------|-------------------|------|----------|
|     |            |             |         |    | Frequency of A1 |                   | OR   | P        | HWE  | Status                        | Frequency of A1 |                   | OR   | P        |
|     |            |             | A1      | A2 | Cases (n=802)   | Controls (n=1858) |      |          |      |                               | Cases (n=818)   | Controls (n=1755) |      |          |
| 1   | rs4845911  | 12,615,712  | A       | G  | 0.28            | 0.22              | 1.39 | 1.33E-05 | 0.39 | G/G                           | 0.23            | 0.24              | 0.95 | 0.55     |
| 1   | rs4653551  | 226,694,536 | G       | A  | 0.26            | 0.33              | 0.71 | 3.01E-06 | 0.89 | I/G                           | 0.31            | 0.32              | 0.96 | 0.49     |
| 2   | rs17033369 | 67,360,228  | C       | T  | 0.09            | 0.06              | 2.05 | 1.60E-08 | 0.35 | G/I                           | 0.08            | 0.08              | 0.95 | 0.7      |
| 2   | rs3731611  | 119,459,081 | G       | T  | 0.43            | 0.5               | 0.72 | 9.70E-07 | 0.41 | I/I                           | 0.44            | 0.47              | 0.88 | 0.07     |
| 2   | rs950233   | 201,302,430 | A       | G  | 0.14            | 0.19              | 0.66 | 5.75E-06 | 0.95 | I/G                           | 0.16            | 0.17              | 0.94 | 0.54     |
| 3   | rs9876109  | 1,525,301   | G       | A  | 0.29            | 0.36              | 0.72 | 6.27E-06 | 0.96 | I/G                           | 0.34            | 0.34              | 1.01 | 0.89     |
| 4   | rs10032586 | 25,009,566  | G       | A  | 0.1             | 0.07              | 1.75 | 1.47E-06 | 0.70 | G/I                           | 0.07            | 0.08              | 0.92 | 0.47     |
| 6   | rs3130139  | 30,465,155  | T       | C  | 0.39            | 0.31              | 1.34 | 2.28E-05 | 0.11 | G/I                           | 0.35            | 0.33              | 1.11 | 0.1      |
| 6   | rs975195   | 30,585,926  | G       | A  | 0.39            | 0.35              | 1.30 | 1.82E-04 | 0.03 | G/I                           | 0.35            | 0.35              | 0.99 | 0.88     |
| 6   | rs2261033  | 31,711,570  | A       | G  | 0.45            | 0.5               | 0.80 | 1.09E-03 | 0.67 | G/G                           | 0.45            | 0.49              | 0.87 | 0.04     |
| 6   | rs12614    | 32,022,158  | T       | C  | 0.12            | 0.06              | 2.37 | 8.99E-13 | 0.59 | G/I                           | N/A             | N/A               | N/A  | N/A      |
| 6   | rs415929   | 32,297,010  | C       | T  | 0.26            | 0.19              | 1.43 | 3.18E-06 | 0.18 | G/G                           | 0.23            | 0.21              | 1.08 | 0.33     |
| 6   | rs498422   | 32,394,739  | G       | T  | 0.2             | 0.13              | 1.81 | 1.53E-11 | 0.55 | G/I                           | 0.17            | 0.13              | 1.37 | 1.47E-04 |
| 6   | rs2076531  | 32,471,690  | G       | A  | 0.11            | 0.06              | 2.03 | 1.00E-09 | 0.11 | I/G                           | 0.1             | 0.07              | 1.42 | 9.75E-04 |
| 6   | rs3129878  | 32,516,713  | C       | A  | 0.4             | 0.29              | 1.63 | 1.03E-12 | 0.03 | G/G                           | 0.36            | 0.3               | 1.32 | 1.48E-05 |
| 6   | rs7192     | 32,519,624  | T       | G  | 0.32            | 0.26              | 1.42 | 1.02E-06 | 0.88 | G/I                           | 0.32            | 0.27              | 1.26 | 3.71E-04 |
| 6   | rs7747521  | 32,539,083  | G       | A  | 0.28            | 0.21              | 1.59 | 2.00E-09 | 0.35 | I/G                           | 0.29            | 0.21              | 1.55 | 2.02E-10 |
| 6   | rs35120848 | 32,778,473  | T       | C  | 0.14            | 0.09              | 1.62 | 1.92E-06 | 0.14 | G/G                           | N/A             | N/A               | N/A  | N/A      |

| CHR | SNP        | BP          | GWAS    |    |                 |                   |      |          | Confirmation (Northern China) |        |                 |                   |      |      |
|-----|------------|-------------|---------|----|-----------------|-------------------|------|----------|-------------------------------|--------|-----------------|-------------------|------|------|
|     |            |             | Alleles |    | Frequency of A1 |                   | OR   | P        | HWE                           | Status | Frequency of A1 |                   | OR   | P    |
|     |            |             | A1      | A2 | Cases (n=802)   | Controls (n=1858) |      |          |                               |        | Cases (n=818)   | Controls (n=1755) |      |      |
| 6   | rs6912492  | 32,977,687  | A       | G  | 0.22            | 0.16              | 1.42 | 2.23E-05 | 0.69                          | I/I    | 0.19            | 0.18              | 1.09 | 0.25 |
| 7   | rs2385466  | 104,298,151 | C       | T  | 0.07            | 0.11              | 0.59 | 1.42E-05 | 0.25                          | I/G    | 0.1             | 0.11              | 0.93 | 0.55 |
| 7   | rs7802723  | 137,579,847 | T       | C  | 0.1             | 0.06              | 1.89 | 2.07E-07 | 0.29                          | G/I    | N/A             | N/A               | N/A  | N/A  |
| 8   | rs4976955  | 143,348,657 | C       | T  | 0.08            | 0.05              | 1.74 | 1.94E-05 | 0.32                          | G/I    | 0.06            | 0.07              | 0.85 | 0.27 |
| 9   | rs1326807  | 118,625,673 | C       | T  | 0.1             | 0.06              | 1.79 | 1.59E-06 | 1.00                          | G/I    | 0.1             | 0.08              | 1.17 | 0.19 |
| 11  | rs11040248 | 5,980,157   | G       | A  | 0.1             | 0.06              | 1.72 | 7.72E-06 | 0.67                          | G/I    | 0.1             | 0.1               | 0.99 | 0.93 |
| 11  | rs10834232 | 23,883,206  | C       | T  | 0.09            | 0.06              | 1.91 | 1.02E-06 | 0.02                          | G/I    | 0.08            | 0.08              | 1.04 | 0.78 |
| 11  | rs13377211 | 80,197,054  | G       | A  | 0.09            | 0.05              | 1.87 | 1.62E-06 | 0.62                          | I/I    | 0.09            | 0.09              | 0.95 | 0.72 |
| 11  | rs12419806 | 92,640,128  | C       | A  | 0.19            | 0.26              | 0.69 | 5.93E-06 | 0.55                          | I/G    | 0.24            | 0.24              | 1    | 0.96 |
| 12  | rs11057353 | 122,831,640 | T       | C  | 0.09            | 0.06              | 1.76 | 6.14E-06 | 0.21                          | G/I    | 0.07            | 0.07              | 1.02 | 0.88 |
| 13  | rs4770720  | 18,537,078  | T       | G  | 0.11            | 0.08              | 1.66 | 8.74E-06 | 0.80                          | G/I    | N/A             | N/A               | N/A  | N/A  |
| 13  | rs278040   | 29,357,712  | C       | T  | 0.1             | 0.06              | 1.75 | 5.06E-06 | 0.88                          | G/I    | 0.07            | 0.09              | 0.8  | 0.05 |
| 13  | rs1320526  | 112,608,380 | T       | C  | 0.12            | 0.07              | 1.68 | 2.77E-06 | 0.71                          | G/I    | 0.09            | 0.1               | 0.85 | 0.11 |
| 14  | rs7149094  | 50,948,557  | A       | G  | 0.11            | 0.08              | 1.68 | 4.51E-06 | 0.39                          | I/I    | N/A             | N/A               | N/A  | N/A  |
| 14  | rs8006145  | 63,769,203  | A       | C  | 0.18            | 0.12              | 1.56 | 1.06E-06 | 0.94                          | G/I    | 0.16            | 0.15              | 1.1  | 0.29 |
| 15  | rs12592037 | 35,623,271  | T       | C  | 0.13            | 0.18              | 0.67 | 1.40E-05 | 0.35                          | I/G    | 0.2             | 0.17              | 1.16 | 0.1  |
| 15  | rs16964657 | 50,061,705  | T       | C  | 0.18            | 0.13              | 1.62 | 1.41E-07 | 0.52                          | G/I    | 0.14            | 0.16              | 0.85 | 0.1  |
| 17  | rs2665969  | 71,633,804  | C       | T  | 0.13            | 0.08              | 1.79 | 3.50E-08 | 0.08                          | G/I    | 0.12            | 0.12              | 0.97 | 0.74 |
| 18  | rs11152112 | 54,813,028  | A       | G  | 0.09            | 0.06              | 1.78 | 2.20E-06 | 0.55                          | G/I    | 0.1             | 0.09              | 1.16 | 0.2  |

N/A: SNPs wherein genotyping failed.
